# Supplementary material
Source: publisher site journal article supplement (https://www.dovepress.com/article/375759)
Supplement: Supplementary file 1 [file get_supplementary_file.php]

**Supplementary Material**

**Table S1 Relationship between univariate and the risk of carotid plaques**

| Variables | Carotid plaques | | |
| --- | --- | --- | --- |
| OR(95 % CI) | *β* | *P*-value |
| Sex |  |  |  |
| Male, n (%) | Reference | | |
| Female, n (%) | 0.475(0.438-0.516) | -0.744 | <0.001 |
| Age, years | 1.079(1.074-1.085) | 0.076 | <0.001 |
| SBP, mmHg | 0.997(0.995-0.999) | -0.003 | 0.002 |
| DBP, mmHg | 0.995(0.992-0.998) | -0.005 | 0.003 |
| FBG,mmol/L | 1.049(1.035-1.064) | 0.048 | <0.001 |
| HbA1c, % | 1.253(1.213-1.295) | 0.226 | <0.001 |
| TC, mmol/L | 0.941(0.910-0.973) | -0.061 | <0.001 |
| TG, mmol/L | 0.983(0.957-1.010) | -0.017 | 0.219 |
| HDL-C, mmol/L | 0.519(0.454-0.593) | -0.656 | <0.001 |
| LDL-C, mmol/L | 1.056(1.013-1.102) | 0.055 | 0.011 |
| Smoking, n (%) |  |  |  |
| No | Reference |  |  |
| Yes | 1.149(1.061-1.244) | 0.139 | 0.001 |
| Drinking, n (%) |  |  |  |
| No | Reference |  |  |
| Yes | 1.196(1.099-1.301) | 0.179 | <0.001 |
| Use of antilipidemic medication, n (%) |  |  |  |
| No | Reference |  |  |
| Yes | 1.240(1.135-1.355) | 0.215 | <0.001 |
| Use of antihypertensive medication, n (%) |  |  |  |
| No | Reference |  |  |
| Yes | 1.236(1.129-1.353) | 0.212 | <0.001 |
| WBC, ×109/L | 1.069(1.048-1.091) | 0.067 | <0.001 |
| NE, ×109/L | 1.103(1.078-1.130) | 0.098 | <0.001 |
| MO, ×109/L | 3.591(2.820-4.573) | 1.278 | <0.001 |
| LYM, ×109/L | 0.825(0.777-0.877) | 0.031 | <0.001 |
| PLT, ×109/L | 0.999(0.998-0.999) | -0.001 | <0.001 |
| MLR | 6.206(4.621-8.334) | 1.826 | <0.001 |
| NLR | 1.103(1.080-1.127) | 0.098 | <0.001 |
| dNLR | 1.154(1.114-1.195) | 0.143 | <0.001 |
| PLR | 1.001(1.000-1.002) | 0.001 | 0.001 |
| SII | 1.000(1.000-1.000) | 0.000 | <0.001 |
| SIRI | 1.203(1.158-1.249) | 0.185 | <0.001 |
| WMR | 1.006(1.004-1.008) | 0.006 | <0.001 |
| MNM | 1.005(0.996-1.014) | 0.005 | 0.295 |

OR, odds ratio; CI, confidence interval; β, regression coefficient

SBP: Systolic blood pressure, DBP: Diastolic blood pressure, FBG: Fasting blood glucose, HbA1c: Glycated hemoglobin A1c , TC: Total cholesterol, TG: Triglycerides, HDL-C: High-density lipoprotein cholesterol, LDL-C: Low-density lipoprotein cholesterol, WBC: white blood cell, NE: Neutrophils, MO: monocyte, LYM: Lymphocyte, PLT: Platelet, MLR: Monocyte/Lymphocyte ratio, NLR:Neutrophil/Lymphocyte ratio, dNLR: Neutrophil /[White blood-Neutrophil] ratio, PLR: Platelet/Lymphocyte ratio, SII: systemic immune inflammation index; SIRI: system inflammation response index, WMR: White blood/Mean platelet volume ratio, MNM: Lymphocyte×Neutrophil / 104 ratio

**Table S2. Relationship between Leukocyte-derived ratios and number of carotid plaques**

| Leukocyte-derived ratios | Number of carotid plaques | | | |
| --- | --- | --- | --- | --- |
| 1 (*N* = 549) | | ≥ 2 (*N* = 8,125) | |
| OR(95 %CI)a | OR(95 %CI)d | OR(95 %CI)a | OR(95 %CI)d |
| MLR | 4.302(2.473-7.485)** | 2.153(1.257-3.687)** | 6.355(4.725-8.547)** | 1.861(1.382-2.505)** |
| Q1 (MLR ≤ 0.20) | Reference | Reference | Reference | Reference |
| Q2 (0.20< MLR≤ 0.26) | 1.274(0.990-1.638) | 1.175(0.910-1.518) | 1.269(1.139-1.413)** | 1.065(0.947-1.198) |
| Q3 (0.26< MLR< 0.35) | 1.527(1.182-1.973)** | 1.329(1.020-1.732)* | 1.767(1.580-1.976)** | 1.246(1.102-1.409)** |
| Q4 (MLR≥ 0.35) | 1.875(1.447-2.429)** | 1.510(1.147-1.987)** | 2.329(2.072-2.617)** | 1.388(1.217-1.582)** |
| Ptrend | <0.001 | 0.003 | <0.001 | <0.001 |
| NLR | 1.102(1.064-1.142)** | 1.068(1.033-1.104)** | 1.103(1.080-1.127)** | 1.044(1.022-1.065)** |
| Q1 (NLR ≤1.88 ) | Reference | Reference | Reference | Reference |
| Q2 (1.88< NLR≤2.53 ) | 1.139(0.884-1.469) | 1.143(0.883-1.479) | 1.233(1.106-1.375)** | 1.098(0.975-1.236) |
| Q3 (2.53< NLR< 3.55) | 1.301(1.009-1.679)* | 1.245(0.960-1.615) | 1.474(1.318-1.647)** | 1.148(1.061-1.296)* |
| Q4 (NLR≥3.55 ) | 1.685(1.306-2.174)** | 1.563(1.201-2.036)** | 1.959(1.745-2.199)** | 1.381(1.216-1.569)** |
| Ptrend | <0.001 | <0.001 | <0.001 | <0.001 |
| dNLR | 1.161(1.091-1.236)** | 1.123(1.057-1.192)** | 1.153(1.113-1.195)** | 1.073(1.036-1.113)** |
| Q1 (dNLR ≤1.43 ) | Reference | Reference | Reference | Reference |
| Q2 (1.43< dNLR≤1.86 ) | 1.251(0.968-1.616) | 1.233(0.951-1.599) | 1.242(1.113-1.378)** | 1.081(0.959-1.219) |
| Q3 (1.86< dNLR< 2.50) | 1.165(0.896-1.515) | 1.143(0.875-1.493) | 1.315(1.177-1.469)** | 1.080(0.957-1.219) |
| Q4 (dNLR≥ 2.50 ) | 1.799(1.397-2.316)** | 1.725(1.329-2.238)** | 1.730(1.542-1.941)** | 1.299(1.145-1.474)** |
| Ptrend | <0.001 | <0.001 | <0.001 | <0.001 |
| PLR | 1.001(1.000-1.002) | 1.001(1.000-1.002) | 1.001(1.000-1.002)** | 1.001(1.000-1.001)* |
| Q1 (PLR ≤104.74 ) | Reference | Reference | Reference | Reference |
| Q2 (104.74< PLR≤134.53 ) | 1.187(0.918-1.534) | 1.313(1.012-1.703)* | 0.918(0.820-1.027) | 1.020(0.903-1.153) |
| Q3 (134.53< PLR<174.26) | 1.097(0.845-1.425) | 1.221(0.936-1.593) | 0.927(0.828-1.037) | 1.018(0.900-1.151) |
| Q4 (PLR≥ 174.26 ) | 1.247(0.959-1.622) | 1.350(1.033-1.766)* | 1.124(1.002-1.261)* | 1.131(0.997-1.282) |
| Ptrend | 0.177 | 0.074 | 0.012 | 0.049 |
| SII (per 1 SD) | 1.152(1.047-1.267)** | 1.094(0.998-1.200) | 1.182(1.122-1.244)** | 1.094(1.038-1.153)** |
| Q1 (SII ≤0.72 ) | Reference | Reference | Reference | Reference |
| Q2 (0.72< SII≤1.07 ) | 1.041(0.809-1.340) | 1.076(0.833-1.389) | 1.149(1.029-1.283)* | 1.156(1.025-1.303)* |
| Q3 (1.07< SII<1.66) | 1.128(0.874-1.455) | 1.144(0.884-1.482) | 1.329(1.188-1.487)** | 1.252(1.109-1.414)** |
| Q4 (SII≥ 1.66) | 1.306(1.015-1.681)* | 1.270(0.982-1.642) | 1.493(1.333-1.673)** | 1.302(1.150-1.474)** |
| Ptrend | 0.024 | 0.059 | <0.001 | <0.001 |
| SIRI | 1.184(1.118-1.255)** | 1.078(1.024-1.135)** | 1.204(1.159-1.250)** | 1.065(1.030-1.101)** |
| Q1 (SIRI ≤391.36 ) | Reference | Reference | Reference | Reference |
| Q2 (391.36< SIRI≤555.48) | 1.070(0.830-1.380) | 1.008(0.778-1.304) | 1.380(1.239-1.538)** | 1.171(1.041-1.317)** |
| Q3 (555.48< SIRI<817.41) | 1.657(1.297-2.117)** | 1.428(1.110-1.838)** | 1.861(1.663-2.082)** | 1.327(1.174-1.501)** |
| Q4 (SIRI≥ 817.41) | 1.533(1.183-1.988)** | 1.260(0.961-1.653) | 2.329(2.075-2.615)** | 1.490(1.310-1.694)** |
| Ptrend | <0.001 | 0.041 | <0.001 | <0.001 |
| WMR | 1.000(0.995-1.004) | 0.997(0.992-1.001) | 1.006(1.004-1.008)** | 1.003(1.001-1.005)** |
| Q1 (WMR ≤55.08 ) | Reference | Reference | Reference | Reference |
| Q2 (55.08< WMR≤66.44) | 1.026(0.804-1.310) | 0.968(0.755-1.241) | 1.201(1.075-1.342)** | 1.128(0.999-1.273) |
| Q3 (66.44< WMR<80.36) | 1.006(0.786-1.289) | 0.929(0.722-1.196) | 1.243(1.112-1.390)** | 1.144(1.012-1.293)* |
| Q4 (WMR ≥ 80.36) | 0.926(0.714-1.202) | 0.783(0.598-1.026) | 1.482(1.323-1.660)** | 1.264(1.114-1.433)** |
| Ptrend | 0.546 | 0.070 | <0.001 | <0.001 |
| MNM | 0.981(0.959-1.003) | 0.970(0.948-0.994)* | 1.006(0.997-1.016) | 1.009(0.998-1.019) |
| Q1 (MNM ≤4.81 ) | Reference | Reference | Reference | Reference |
| Q2 (4.81< MNM≤6.83) | 0.923(0.718-1.185) | 0.885(0.686-1.141) | 1.011(0.904-1.132) | 0.994(0.879-1.124) |
| Q3 (6.83< MNM<9.54) | 0.927(0.721-1.192) | 0.870(0.673-1.125) | 1.041(0.930-1.165) | 1.038(0.917-1.174) |
| Q4 (MNM ≥ 9.54) | 0.898(0.696-1.159) | 0.812(0.623-1.058) | 1.076(0.961-1.205) | 1.107(0.975-1.256) |
| Ptrend | 0.459 | 0.147 | 0.166 | 0.072 |

OR, odds ratio; CI, confidence interval;

NLR:Neutrophil/Lymphocyte ratio, dNLR: Neutrophil /[White blood-Neutrophil] ratio, MLR: Monocyte/Lymphocyte ratio, PLR: Platelet/Lymphocyte ratio, SII: systemic immune inflammation index; SIRI: system inflammation response index, WMR: White blood/Mean platelet volume ratio, MNM: Lymphocyte×Neutrophil / 104 ratio

Model a: unadjusted;

Model d：adjusted for age, sex, SBP, DBP, FBG, HbA1c, smoking, drinking, TC, TG, HDL-C, LDL-C, use of antilipidemic medication, use of current antihypertensive medication, history of TIA or stroke

*:*P* < 0.05, **: *P* < 0.01.

**Table S3. Relationship between MLR and number of carotid plaques**

| Leukocyte-derived ratios | Number of carotid plaques(N=1) | | | | | | | |
| --- | --- | --- | --- | --- | --- | --- | --- | --- |
| OR(95 %CI)a | *P*-value | OR(95 %CI)b | *P*-value | OR(95 %CI)c | *P*-value | OR(95 %CI)d | *P*-value |
| MLR | 4.302(2.473-7.485) | <0.001 | 1.988(1.175-3.364) | 0.010 | 2.018(1.190-3.424) | 0.009 | 2.153(1.257-3.687) | 0.005 |
| Q1 (MLR ≤ 0.20) | Reference |  | Reference |  | Reference |  | Reference |  |
| Q2 (0.20< MLR≤ 0.26) | 1.274(0.990-1.638) | 0.059 | 1.172(0.910-1.510) | 0.219 | 1.186(0.920-1.529) | 0.188 | 1.175(0.910-1.518) | 0.215 |
| Q3 (0.26< MLR< 0.35) | 1.527(1.182-1.973) | 0.001 | 1.299(1.000-1.687) | 0.050 | 1.314(1.011-1.707) | 0.041 | 1.329(1.020-1.732) | 0.035 |
| Q4 (MLR≥ 0.35) | 1.875(1.447-2.429) | <0.001 | 1.463(1.118-1.916) | 0.006 | 1.469(1.122-1.925) | 0.005 | 1.510(1.147-1.987) | 0.003 |
| *P*trend | <0.001 |  | 0.005 |  | 0.005 |  | 0.003 |  |
|  | Number of carotid plaques(N≥2) | | | | | | | |
| MLR | 6.355(4.725-8.547) | <0.001 | 1.777(1.331-2.373) | <0.001 | 1.737(1.298-2.326) | <0.001 | 1.861(1.382-2.505) | <0.001 |
| Q1 (MLR ≤ 0.20) | Reference |  | Reference |  | Reference |  | Reference |  |
| Q2 (0.20< MLR≤ 0.26) | 1.269(1.139-1.413) | <0.001 | 1.054(0.940-1.182) | 0.370 | 1.072(0.955-1.205) | 0.240 | 1.065(0.947-1.198) | 0.291 |
| Q3 (0.26< MLR< 0.35) | 1.767(1,580-1.976) | <0.001 | 1.239(1.098-1.397) | <0.001 | 1.251(1.108-1.413) | <0.001 | 1.246(1.102-1.409) | <0.001 |
| Q4 (MLR≥ 0.35) | 2.329(2.072-2.617) | <0.001 | 1.366(1.203-1.551) | <0.001 | 1.361(1.197-1.548) | <0.001 | 1.388(1.217-1.582) | <0.001 |
| *P*trend | <0.001 |  | <0.001 |  | <0.001 |  | <0.001 |  |

OR, odds ratio; CI, confidence interval; MLR: Monocyte/Lymphocyte ratio

Model a: unadjusted;

Model b：adjusted for age, sex

Model c：adjusted for age, sex, SBP, DBP, FBG, HbA1c, smoking, drinking

Model d：adjusted for age, sex, SBP, DBP, FBG, HbA1c, smoking, drinking, TC, TG, HDL-C, LDL-C, use of antilipidemic medication, use of current antihypertensive medication, history of TIA or stroke

**Table S4. Relationship between Leukocyte-derived ratios and carotid plaques echogenicity**

| Leukocyte-derived ratios | Carotid plaque echogenicity | | | | | | | |
| --- | --- | --- | --- | --- | --- | --- | --- | --- |
| Hypoechoic (*N* =577 ) | | Isoechoic(*N* =702 ) | | Hyperechoic(*N* =4,777 ) | | Mixture(*N* =2,618 ) | |
| OR(95 %CI)a | OR(95 %CI)d | OR(95 %CI)a | OR(95 %CI)d | OR(95 %CI)a | OR(95 %CI)d | OR(95 %CI)a | OR(95 %CI)d |
| MLR | 3.516(.994-6.199)** | 1.313(0.734-2.348) | 5.811(3.616-9.338)** | 1.936(1.189-3.152)** | 6.691(4.906-9.124) | 2.024(1.481-2.767)** | 6.185(4.414-8.667)** | 1.751(1.237-2.478)** |
| Q1 (MLR ≤ 0.20) | Reference | Reference | Reference | Reference | Reference | Reference | Reference | Reference |
| Q2 (0.20< MLR≤ 0.26) | 1.121(0.879-1.430) | 0.978(0.764-1.252) | 1.065(0.843-1.346) | 0.916(0.721-1.163) | 1.308(1.159-1.476)** | 1.111(0.976-1.265) | 1.300(1.128-1.499)** | 1.058(0.993-1.262) |
| Q3 (0.26< MLR< 0.35) | 1.394(1.090-1.783)** | 1.057(0.820-1.363) | 1.557(1.239-1.958)** | 1.173(0.924-1.488) | 1.809(1.598-2.049)** | 1.304(1.140-1.492)** | 1.798(1.556-2.076)** | 1.240(1.062-1.448)** |
| Q4 (MLR≥ 0.35) | 1.161(1.256-2.079)** | 1.082(0.827-1.415) | 2.064(1.643-2.593)** | 1.316(1.030-1.681)* | 2.468(2.172-2.805)** | 1.516(1.315-1.748)** | 2.245(1.936-2.603)** | 1.303(1.107-1.534)** |
| Ptrend | <0.001 | 0.442 | <0.001 | 0.004 | <0.001 | <0.001 | <0.001 | 0.001 |
| NLR | 1.073(1.032-1.116)** | 1.029(0.990-1.070) | 1.105(1.070-1.141)** | 1.055(1.022-1.089)** | 1.108(1.083-1.133)** | 1.049(1.027-1.072)** | 1.100(1.074-1.127)** | 1.039(1.015-1.065)** |
| Q1 (NLR ≤1.88 ) | Reference | Reference | Reference | Reference | Reference | Reference | Reference | Reference |
| Q2 (1.88< NLR≤2.53 ) | 1.220(0.995-1.560) | 1.111(0.866-1.425) | 1.148(0.912-1.444) | 1.086(0.859-1.327) | 1.273(1.127-1.437)** | 1.144(1.004-1.303)* | 1.169(1.012-1.349)* | 1.025(0.881-1.193) |
| Q3 (2.53< NLR< 3.55) | 1.237(0.961-1.593) | 1.042(0.805-1.349) | 1.210(0.957-1.530) | 1.048(0.823-1.334) | 1.503(1.329-1.700)** | 1.185(1.037-1.353)* | 1.513(1.312-1.746)** | 1.158(0.994-1.348) |
| Q4 (NLR≥3.55 ) | 1.693(1.319-2.174)** | 1.366(1.031-1.732)* | 1.897(1.513-2.378)** | 1.515(1.195-1.920)** | 1.971(1.736-2.238)** | 1.403(1.221-1.611)** | 1.955(1.689-2.263)** | 1.357(1.159-1.598)** |
| Ptrend | <0.001 | 0.033 | <0.001 | <0.001 | <0.001 | <0.001 | <0.001 | <0.001 |
| dNLR | 1.107(1.034-1.186)** | 1.054(0.984-1.128) | 1.163(1.099-1.231)** | 1.101(1.040-1.166)** | 1.163(1.120-1.207)** | 1.083(1.043-1.125)** | 1.145(1.098-1.193)** | 1.063(1.019-1.109)** |
| Q1 (dNLR ≤1.43 ) | Reference | Reference | Reference | Reference | Reference | Reference | Reference | Reference |
| Q2 (1.43< dNLR≤1.86 ) | 1.218(0.952-1.560) | 1.102(0.858-1.415) | 1.196(0.949-1.507) | 1.114(0.880-1.411) | 1.310(1.159-1.479)** | 1.147(1.006-1.307)* | 1.144(0.991-1.321) | 0.985(0.846-1.147) |
| Q3 (1.86< dNLR< 2.50) | 1.168(0.909-1.503) | 1.028(0.796-1.327) | 1.217(0.964-1.535) | 1.107(0.872-1.406) | 1.330(1.177-1.504)** | 1.097(0.961-1.253) | 1.317(1.143-1.518)** | 1.068(0.918-1.243) |
| Q4 (dNLR≥ 2.50 ) | 1.550(1.208-1.990)* | 1.300(1.005-1.682)** | 1.728(1.375-2.172) | 1.481(1.168-1.879)** | 1.769(1.559-2.007)** | 1.331(1.161-1.527)** | 1.719(1.487-1.987)** | 1.282(1.097-1.498)** |
| Ptrend | 0.001 | 0.056 | <0.001 | 0.001 | <0.001 | <0.001 | <0.001 | <0.001 |
| PLR | 1.000(0.999-1.001) | 1.000(0.999-1.001) | 1.001(1.000-1.002) | 1.001(1.000-1.002) | 1.001(1.001-1.002)** | 1.001(1.000-1.001)* | 1.001(1.001-1.002)** | 1.001(1.000-1.001) |
| Q1 (PLR ≤104.74 ) | Reference | Reference | Reference | Reference | Reference | Reference | Reference | Reference |
| Q2 (104.74< PLR≤134.53 ) | 0.903(0.710-1.150) | 0.999(0.782-1.275) | 0.883(0.703-1.111) | 1.018(0.806-1.286) | 0.954(0.843-1.000) | 1.053(0.922-1.202) | 0.916(0.793-1.058) | 1.035(0.888-1.205) |
| Q3 (134.53< PLR<174.26) | 0.788(0.614-1.011) | 0.871(0.676-1.122) | 0.934(0.745-1.172) | 1.093(0.867-1.379) | 0.956(0.845-1.082) | 1.039(0.909-1.188) | 0.938(0.812-1.083) | 1.047(0.898-1.220) |
| Q4 (PLR≥ 174.26 ) | 0.909(0.708-1.167) | 0.961(0.744-1.242) | 1.016(0.807-1.279) | 1.109(0.875-1.407) | 1.168(1.030-1.325)* | 1.163(1.015-1.332)* | 1.150(0.996-1.329) | 1.178(1.009-1.375)* |
| Ptrend | 0.435 | 0.635 | 0.665 | 0.341 | 0.005 | 0.033 | 0.018 | 0.033 |
| SII (per 1 SD) | 1.089(0.980-1.210) | 1.035(0.932-1.150) | 1.198(1.105-1.298)** | 1.116(1.029-1.210)** | 1.184(1.122-1.250)** | 1.095(1.036-1.157)** | 1.185(1.117-1.258)** | 1.097(1.033-1.166)** |
| Q1 (SII ≤0.72 ) | Reference | Reference | Reference | Reference | Reference | Reference | Reference | Reference |
| Q2 (0.72< SII≤1.07 ) | 1.296(1.009-1.663)* | 1.299(1.009-1.672)* | 1.128(0.895-1.422) | 1.157(0.914-1.465) | 1.102(0.975-1.245) | 1.110(0.974-1.266) | 1.185(1.028-1.367)* | 1.182(1.017-1.375)* |
| Q3 (1.07< SII<1.66) | 1.472(1.147-1.889)** | 1.409(1.094-1.814)** | 1.242(0.984-1.568) | 1.243(0.980-1.576) | 1.320(1.167-1.493)** | 1.241(1.087-1.416)** | 1.293(1.119-1.494)** | 1.206(1.034-1.405)* |
| Q4 (SII≥ 1.66) | 1.335(1.029-1.731)* | 1.229(0.943-1.601) | 1.523(1.212-1.914)** | 1.402(1.108-1.773)** | 1.457(1.286-1.651)** | 1.270(1.110-1.453)** | 1.543(1.335-1.783)** | 1.337(1.147-1.560)** |
| Ptrend | 0.055 | 0.252 | <0.001 | 0.005 | <0.001 | <0.001 | <0.001 | 0.001 |
| SIRI | 1.138(1.065-1.216)** | 1.026(0.963-1.094) | 1.215(1.156-1.276)** | 1.078(1.029-1.129)** | 1.208(1.162-1.256)** | 1.070(1.033-1.108)** | 1.204(1.156-1.254)** | 1.063(1.024-1.104)** |
| Q1 (SIRI ≤391.36 ) | Reference | Reference | Reference | Reference | Reference | Reference | Reference | Reference |
| Q2 (391.36< SIRI≤555.48) | 1.215(0.949-1.554) | 1.052(0.820-1.351) | 1.276(1.011-1.610)* | 1.123(0.886-1.424) | 1.359(1.204-1.534)** | 1.165(1.023-1.326)* | 1.414(1.225-1.630)** | 1.176(1.012-1.368)* |
| Q3 (555.48< SIRI<817.41) | 1.667(1.306-2.127)** | 1.261(0.981-1.620) | 1.568(1.239-1.984)** | 1.181(0.926-1.506) | 1.906(1.684-2.158)** | 1.393(1.218-1.592)** | 1.861(1.609-2.152)** | 1.287(1.102-1.503)** |
| Q4 (SIRI≥ 817.41) | 1.609(1.246-2.079)** | 1.131(0.866-1.477) | 2.271(1.808-2.853)** | 1.534(1.206-1.951)** | 2.315(2.039-2.629)** | 1.518(1.320-1.746)** | 2.354(2.032-2.726)** | 1.460(1.244-1.713)** |
| Ptrend | <0.001 | 0.305 | <0.001 | <0.001 | <0.001 | <0.001 | <0.001 | <0.001 |
| WMR | 1.005(1.001-1.009)* | 1.002(0.998-1.006) | 1.008(1.004-1.011)** | 1.004(1.000-1.008)* | 1.005(1.003-1.007)** | 1.002(1.000-1.004) | 1.007(1.004-1.009)** | 1.003(1.001-1.006)** |
| Q1 (WMR ≤55.08 ) | Reference | Reference | Reference | Reference | Reference | Reference | Reference | Reference |
| Q2 (55.08< WMR≤66.44) | 1.333(1.038-1.712)* | 1.249(0.969-1.609) | 1.416(1.120-1.790)** | 1.326(1.044-1.684)* | 1.191(1.054-1.346)** | 1.121(0.983-1.279) | 1.098(0.952-1.268) | 1.011(0.868-1.177) |
| Q3 (66.44< WMR<80.36) | 1.259(0.976-1.624) | 1.147(0.885-1.487) | 1.278(1.005-1.626)* | 1.152(0.900-1.475) | 1.248(1.104-1.411)** | 1.159(1.015-1.324)* | 1.166(1.011-1.345)* | 1.049(0.901-1.223) |
| Q4 (WMR ≥ 80.36) | 1.467(1.138-1.891)** | 1.259(0.970-1.636) | 1.790(1.419-2.258)** | 1.448(1.137-1.844)** | 1.389(1.226-1.574)** | 1.189(1.037-1.363)* | 1.443(1.250-1.665)** | 1.199(1.027-1.399)* |
| Ptrend | 0.007 | 0.154 | <0.001 | 0.010 | <0.001 | 0.016 | <0.001 | 0.013 |
| MNM | 1.003(0.983-1.023) | 1.000(0.979-1.022) | 1.019(1.001-1.036)* | 1.011(0.993-1.030) | 1.000(0.990-1.010) | 1.002(0.991-1.013) | 1.011(0.999-1.022) | 1.012(0.998-1.025) |
| Q1 (MNM ≤4.81 ) | Reference | Reference | Reference | Reference | Reference | Reference | Reference | Reference |
| Q2 (4.81< MNM≤6.83) | 0.989(0.766-1.276) | 0.964(0.744-1.249) | 1.054(0.832-1.334) | 1.020(0.801-1.298) | 1.012(0.894-1.145) | 0.995(0.871-1.136) | 0.985(0.853-1.137) | 0.963(0.827-1.123) |
| Q3 (6.83< MNM<9.54) | 1.150(0.897-1.473) | 1.103(0.856-1.421) | 1.177(0.993-1.484) | 1.119(0.882-1.420) | 1.017(0.898-1.151) | 1.017(0.889-1.163) | 1.003(0.868-1.159) | 0.988(0.847-1.153) |
| Q4 (MNM ≥ 9.54) | 1.121(0.873-1.441) | 1.090(0.840-1.415) | 1.242(0.986-1.564) | 1.145(0.899-1.459) | 1.020(0.901-1.156) | 1.053(0.918-1.208) | 1.089(0.943-1.257) | 1.108(0.948-1.296) |
| Ptrend | 0.255 | 0.370 | 0.046 | 0.217 | 0.758 | 0.399 | 0.183 | 0.123 |

OR, odds ratio; CI, confidence interval;

NLR:Neutrophil/Lymphocyte ratio, dNLR: Neutrophil /[White blood-Neutrophil] ratio, MLR: Monocyte/Lymphocyte ratio, PLR: Platelet/Lymphocyte ratio, SII: systemic immune inflammation index; SIRI: system inflammation response index, WMR: White blood/Mean platelet volume ratio, MNM: Lymphocyte×Neutrophil / 104 ratio

Model a: unadjusted;

Model d：adjusted for age, sex, SBP, DBP, FBG, HbA1c, smoking, drinking, TC, TG, HDL-C, LDL-C, use of antilipidemic medication, use of current antihypertensive medication, history of TIA or stroke

*: P < 0.05, **: P < 0.01..

**Table S5 Interaction between the MLR and the sex or age in the risk of Carotid plaques**

|  | ***β*** | **SE** | ***P*-value** | **OR(95% CI)** |
| --- | --- | --- | --- | --- |
| **Model** d | | | | |
| MLR | 0.636 | 0.151 | <0.001 | 1.889(1.406-2.539) |
| Sex | -0.982 | 0.050 | <0.001 | 0.374(0.340-0.413) |
| MLR × Sex | -0.406 | 0.292 | 0.164 | 0.667(0.376-1.180) |
| **Model** d | | | | |
| MLR | 0.636 | 0.151 | <0.001 | 1.889(1.406-2.539) |
| Age | 0.091 | 0.003 | <0.001 | 1.095(1.089-1.102) |
| MLR × Age | -0.042 | 0.019 | 0.029 | 0.959(0.923-0.996) |

Model d：adjusted for age, sex, SBP, DBP, FBG, HbA1c, smoking, drinking, TC, TG, HDL-C, LDL-C, use of antilipidemic medication, use of current antihypertensive medication, history of TIA or stroke
